# Supplementary material for: A self-aligned high resolution patterning process for large area printed electronics
Source: Royal Society of Chemistry journal article supplement (doi:10.1039/c7tc01590a), 2017-01-01
Supplement: c7tc01590a2.pdf [file c7tc01590a2.pdf]

## **Electronic Supporting Information**

# **Self-aligned High Resolution Patterning Process for Large Area Printed Electronics**

*Won-Tae Park<sup>†</sup>, and Yong-Young Noh<sup>†,\*</sup>*

Department of Energy Materials Engineering, Dongguk University, 30, Pildong-ro 1-gil, Jung-gu, Seoul 04620, Republic of Korea

### **Corresponding Authors**

\*yynoh@dongguk.edu

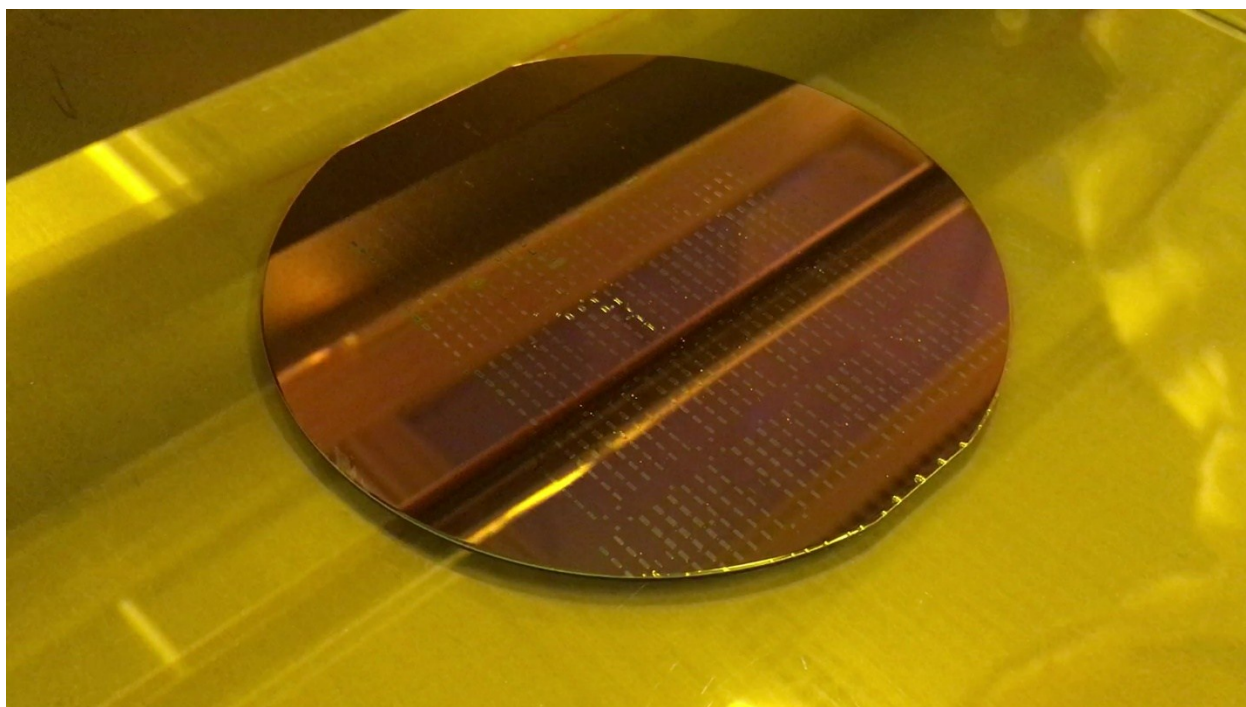

Figure S1. Movie clip of self-align printing process

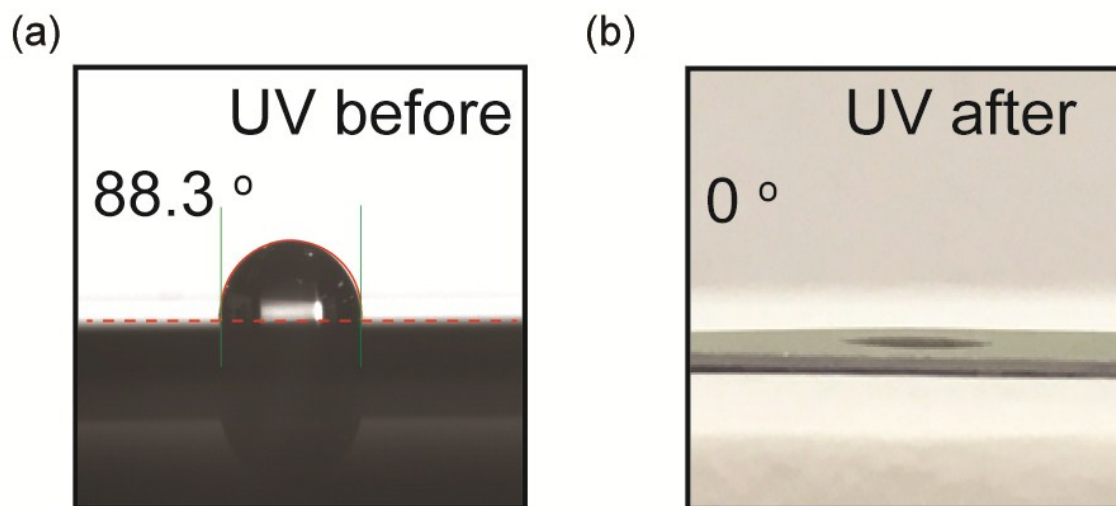

Figure S2. CCD image of the surface as deposited: (a) SAM, and (b) after UV treatment of the substrate.

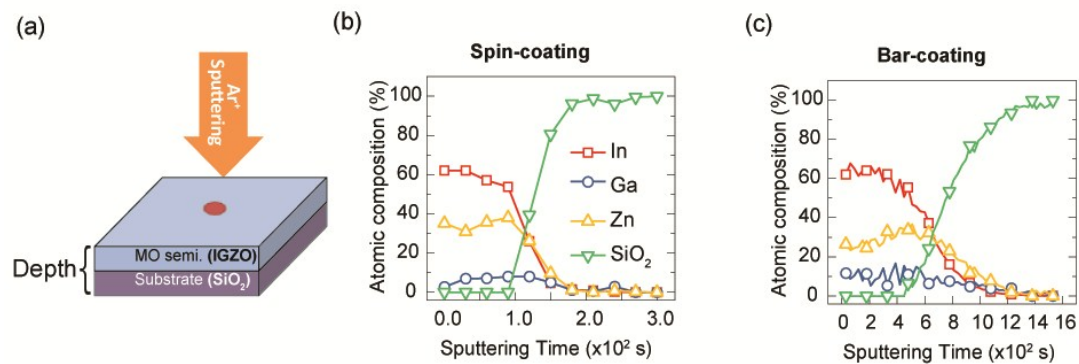

Figure S3. XPS for atomic concentration analysis at (a) spot of the IGZO film. (b) and (c) depth profiles of the spin-coated and bar-coated film.

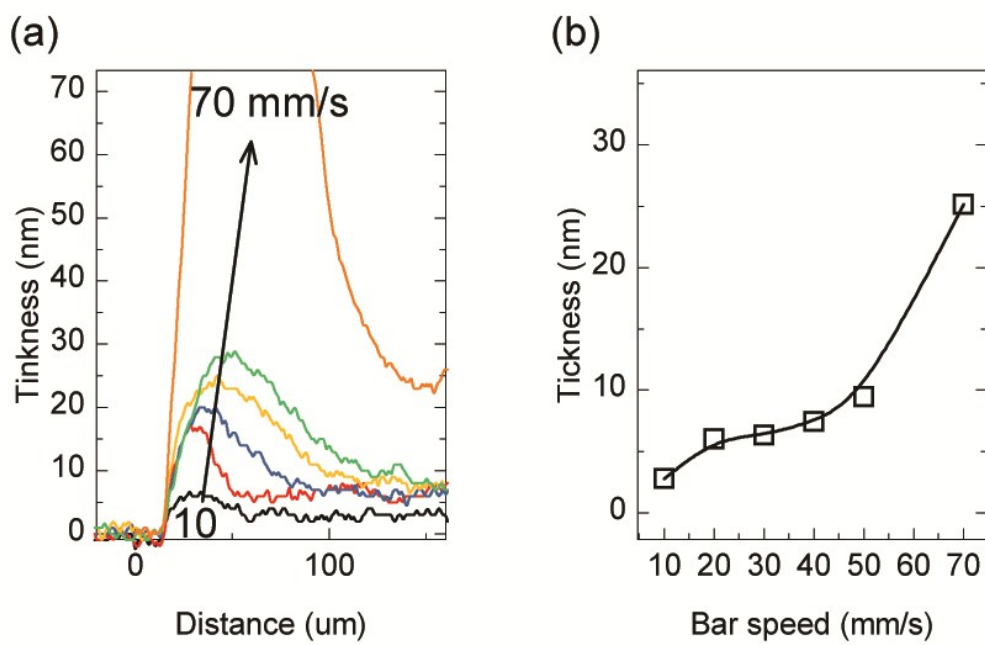

Figure S4. Bar-coated oxide film thickness at different speeds (from 10 to 70 mm/s).
